# Supplementary material for: Heavy metal ions removal from aqueous solution by xanthate-modified cross-linked magnetic chitosan/poly(vinyl alcohol) particles
Source: Royal Society of Chemistry journal article supplement (doi:10.1039/c7ra02810e), 2017-01-01
Supplement: c7ra02810e1.pdf [file c7ra02810e1.pdf]

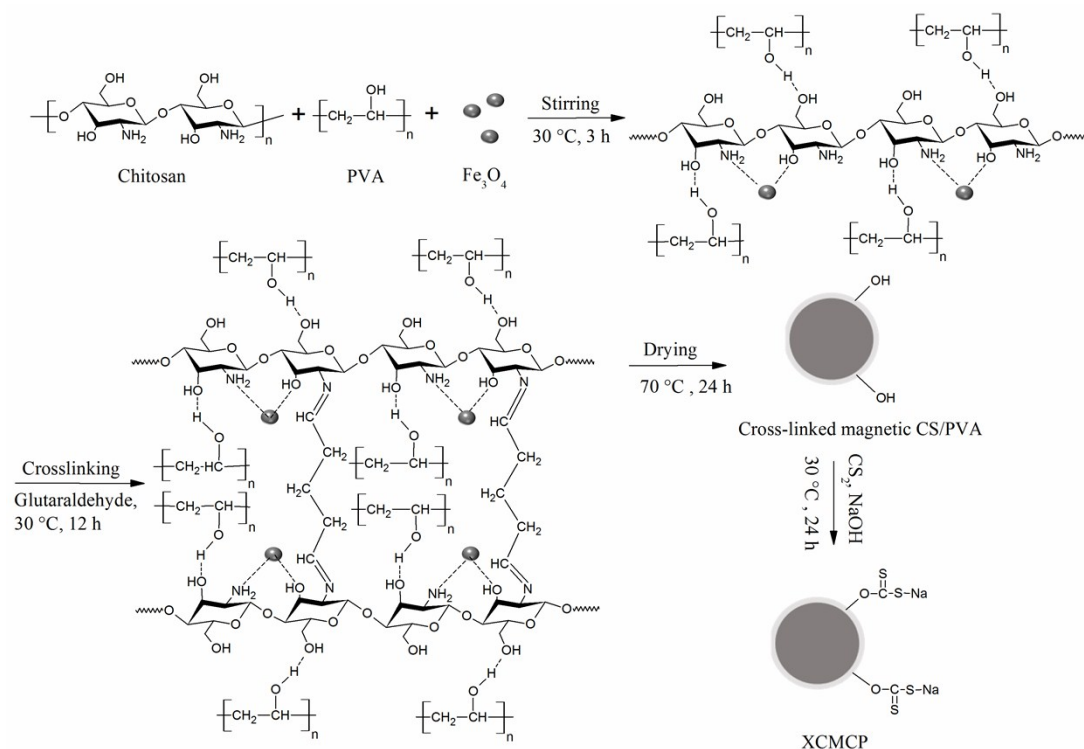

Fig. S1. Schematic illustrations of the synthesis strategy used to prepare xanthate-modified cross-linked magnetic chitosan/poly (vinyl alcohol) particles

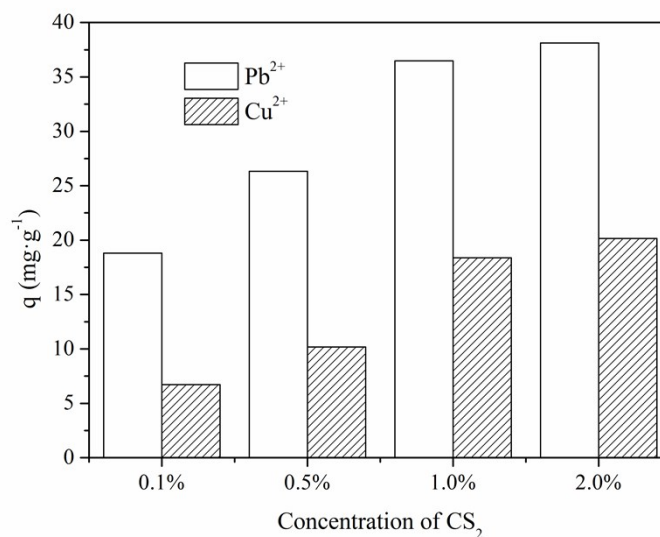

Fig. S2. Effect of  $CS_2$  on adsorption of  $Pb^{2+}$  and  $Cu^{2+}$  onto XCMCP. Experimental condition: initial metal ions concentration was 100 mg/L, dosage of XCMCP was 0.15 g/ 50 mL, and temperature was 303K
